# Supplementary material for: Understanding the challenges associated with finding and accessing restricted data in Canada: a mixed methods study
Source: Atypon-hosted journal article supplement (doi:10.1139/facets-2023-0102), 2024-01-01
Supplement: facets-2023-0102suppla.pdf [file facets-2023-0102suppla.pdf]

**Supplemental File 1. CRediT Taxonomy for:** Understanding the Challenges Associated with Finding and Accessing Restricted Data in Canada: A Mixed Methods Study

| <b>Term</b>                | <b>Authorship Initials</b>      |
|----------------------------|---------------------------------|
| Conceptualization          | KBR, GG, AL, LP, SR, VS, KS     |
| Data curation              | KBR, GG, AL, LP, SR, VS, KS     |
| Formal analysis            | KBR, GG, AL, LP, SR, JS, VS, KS |
| Funding acquisition        | N/A                             |
| Investigation              | KBR, GG, AL, LP, SR, JS, VS, KS |
| Methodology                | KBR, GG, AL, LP, SR, VS, KS     |
| Project administration     | KBR                             |
| Resources                  | KBR                             |
| Software                   | N/A                             |
| Supervision                | KBR                             |
| Validation                 | KBR, GG, AL, LP, SR, JS, VS, KS |
| Visualization              | KBR                             |
| Writing – original draft   | KBR, GG, AL, SR, VS, KS         |
| Writing – review & editing | KBR, GG, AL, LP, SR, JS, VS, KS |
