# Supplementary material for: Understanding the challenges associated with finding and accessing restricted data in Canada: a mixed methods study
Source: Atypon-hosted journal article supplement (doi:10.1139/facets-2023-0102), 2024-01-01
Supplement: facets-2023-0102supplb.pdf [file facets-2023-0102supplb.pdf]

**Supplemental File 2. Search strategies for identifying access-limited data sources**

| Access-Limited Search String                                                                                                                                                                                                                                               | Provincial/Federal Search String                                                                                                                                                                                                                  |
|----------------------------------------------------------------------------------------------------------------------------------------------------------------------------------------------------------------------------------------------------------------------------|---------------------------------------------------------------------------------------------------------------------------------------------------------------------------------------------------------------------------------------------------|
| <p>("data use agreement*" OR "data access agreement*" OR "data transfer agreement*" OR ((restricted OR sensitive) AND data*) OR (access AND data*) OR (data* AND transfer*) OR (request* AND data*) OR "Data catalogue" OR (data* AND portal) OR (data* AND registr*))</p> | <p><b>Ontario:</b><br/> ontario OR guelph OR "thunder bay" OR sudbury OR ottawa OR welland OR waterloo OR peterborough OR toronto OR hamilton OR windsor OR kitchener OR barrie OR kingston OR mississauga OR oshawa OR markham OR belleville</p> |
|                                                                                                                                                                                                                                                                            | <p><b>Yukon and Territories:</b><br/> Yukon OR Whitehorse OR "Northwest Territories" OR Yellowknife OR Nunavut OR Iqaluit</p>                                                                                                                     |
|                                                                                                                                                                                                                                                                            | <p><b>Prairies:</b><br/> Alberta OR Edmonton OR Calgary OR Saskatchewan OR Saskatoon OR Regina OR Manitoba OR Winnipeg</p>                                                                                                                        |
|                                                                                                                                                                                                                                                                            | <p><b>British Columbia:</b><br/> "British Columbia" OR Vancouver OR Victoria</p>                                                                                                                                                                  |
|                                                                                                                                                                                                                                                                            | <p><b>Quebec:</b><br/> Quebec OR Montreal OR Laval OR Gatineau</p>                                                                                                                                                                                |
|                                                                                                                                                                                                                                                                            | <p><b>Maritimes:</b><br/> "Prince Edward Island" OR Charlottetown OR "New Brunswick" OR Fredericton OR Moncton OR "Nova Scotia" OR Halifax OR Newfoundland OR Labrador</p>                                                                        |
